1       **Bacterial adaptation to diet is a key evolutionary force shaping *Drosophila-***  
2                                      ***Lactobacillus* symbiosis**

3  
4       Maria Elena Martino<sup>1\*</sup>, Pauline Joncour<sup>1</sup>, Ryan Leenay<sup>2</sup>, Hugo Gervais<sup>1</sup>, Malay Shah<sup>2</sup>, Sandrine  
5       Hughes<sup>1</sup>, Benjamin Gillet<sup>1</sup>, Chase Beisel<sup>2</sup>, François Leulier<sup>1\*</sup>

6  
7       <sup>1</sup>Institut de Génomique Fonctionnelle de Lyon, Université de Lyon, Ecole Normale Supérieure de  
8       Lyon, Centre National de la Recherche Scientifique, Université Claude Bernard Lyon 1, Unité  
9       Mixte de Recherche 5242, 69364 Lyon, Cedex 07, France

10  
11       <sup>2</sup>North Carolina State University, Department of Chemical and Biomolecular Engineering,  
12       Raleigh, NC 27695, United States

13  
14       \*Correspondence to: [maria-elena.martino@ens-lyon.fr](mailto:maria-elena.martino@ens-lyon.fr) and [francois.leulier@ens-lyon.fr](mailto:francois.leulier@ens-lyon.fr)  
15  
16  
17  
18  
19  
20  
21  
22  
23

24 **Abstract**

25           Animal-microbe facultative symbioses play a fundamental role in ecosystem and  
26 organismal health (1–3). Yet, due to the flexible nature of their association, the selection pressures  
27 acting on animals and their facultative symbionts remain elusive (4, 5). Here, by applying  
28 experimental evolution to a well-established model of facultative symbiosis: *Drosophila*  
29 *melanogaster* associated with *Lactobacillus plantarum*, one of its growth promoting symbiont (6,  
30 7), we show that the diet, instead of the host, is a predominant driving force in the evolution of this  
31 symbiosis and identify the mechanism resulting from the bacterial adaptation to the diet, which  
32 confers host growth benefits. Our study reveals that adaptation to the diet can be the foremost step  
33 in the determination of the evolutionary course of a facultative symbiosis.

34

35 **Main Text**

36           In facultative symbioses, microbes do not persistently colonize the host; nevertheless, they  
37 confer essential benefits to their animal partners (8, 9). The flexible nature of these relationships  
38 suggests that there are reciprocal costs and benefits associated with maintaining such symbiosis  
39 (3, 9, 10). However, the ecological and evolutionary forces that drive the emergence and evolution  
40 of the benefits that facultative symbionts confer to their animal hosts remain largely elusive. To  
41 address this question, we experimentally tested microbial evolution using *Drosophila*  
42 *melanogaster* associated with one of its most abundant facultative symbionts, *Lactobacillus*  
43 *plantarum*, with whom it establishes nutritional mutualism (9, 11–14). As growth promotion  
44 during undernutrition is one of the major advantages conferred by *L. plantarum* to its animal host  
45 (11, 15), we asked if and how this bacterium can increase its potential to support animal growth  
46 while evolving with its host. To this end, we performed experimental evolution of NIZO2877

47 ( $Lp^{NIZO2877}$ ), a strain of *L. plantarum* isolated from processed human food (16), which was  
48 previously shown to moderately promote growth both in *Drosophila* and mice (11, 15). We mono-  
49 associated germ-free (GF) *Drosophila* eggs with a fully sequenced clonal population of  $Lp^{NIZO2877}$   
50 on a low-nutritional diet and studied the partners for 20 *Drosophila* generations (i.e 313 days,  
51 which correspond to about 2000 bacterial generations; see Methods and Fig. S1-2). At each  
52 generation, we selected the first emerging pupae carrying a subpopulation of *L. plantarum* strains,  
53 and transferred them to a new sterile diet (Methods; Fig. S1). The adults rapidly emerged from the  
54 pupae and deposited the new embryos and their associated *L. plantarum* strains that subsequently  
55 colonized and propagated in the new environment. We then isolated the  $Lp^{NIZO2877}$ -evolved strains  
56 associated with the adult flies eclosed from the transferred pupae, selected a representative set of  
57 isolates and measured individually their growth promoting capacity on an independent set of GF  
58 fly larvae. After only two fly generations (i.e. after about 124 bacterial generations, Fig. 1A,B),  
59 we identified a few evolved  $Lp^{NIZO2877}$  strains that significantly improved larval growth and  
60 accelerated pupariation compared to the ancestor strain. Specifically, the evolved strains exhibited  
61 the same effect as  $Lp^{WJL}$ , a potent *L. plantarum* growth promoting strain (15) (Fig. 1A,B). These  
62 results show that the evolution of  $Lp^{NIZO2877}$  in the context of its symbiosis with *Drosophila* leads  
63 to the rapid improvement of *L. plantarum* animal growth promotion (Fig. S3).

64 To identify the genetic changes underlying the rapid microbial adaptation responsible for  
65 the improved growth of the host, we sequenced the genomes of 11 evolved  $Lp^{NIZO2877}$  strains (Table  
66 S1, replicate 1) with increased host growth promoting potential across the 20 *Drosophila*  
67 generations. We identified a total of 11 mutations, including nine single-nucleotide polymorphisms  
68 (SNPs) and two small deletions (Fig. 1C; Table S2). In particular, in the strain isolated from the  
69 second fly generation (FlyG2.1.8), we found a single change in the genome within one of the three

70 acetate kinase genes (*ackA*). Remarkably, this first mutation was subsequently fixed and strictly  
71 correlated with the improved animal growth phenotype (Fig. 1C).

72 To test the repeatability of this finding, we conducted an independent replicate of *L.*  
73 *plantarum* experimental evolution while in symbiosis with *Drosophila*. Both the phenotypic and  
74 genomic evolution of *L. plantarum* were again obtained: *Lp*<sup>NIZO2877</sup> improved its animal growth  
75 promoting potential by rapidly acquiring and fixing mutations, including variants in the *ackA* gene  
76 (Fig. S4, Table S2). In the first experiment, the evolved *Lp*<sup>NIZO2877</sup> strains with improved animal  
77 growth potential all carried a three-nucleotide deletion in the *ackA* gene that removed one proline  
78 residue. From the second replicate, the evolved strains carried a SNP that resulted in a premature  
79 stop-codon leading to protein truncation (Fig. S5). These independently isolated mutations likely  
80 generate an inactive *ackA* protein. Following the fixation of *ackA* variants, additional mutations  
81 appeared in both replicates of *L. plantarum* experimental evolution, which seem to further improve  
82 its symbiotic benefit (Fig. 1A, Fig. S4A). Nevertheless, the two evolved strains each bearing only  
83 one mutation in *ackA* (FlyG2.1.8 and FlyG3.1.8) already showed a statistically significant  
84 *Drosophila* growth improvement compared to their ancestor (Fig. 1A,B). Based on these  
85 observations, we propose that the *de novo* appearance of the *ackA* mutation is the first fundamental  
86 step in shaping the evolutionary trajectory in the *Lp*<sup>NIZO2877</sup>/*Drosophila* symbiosis model.

87 To fully establish that *ackA* mutation is responsible for the evolution of  
88 *Lp*<sup>NIZO2877</sup>/*Drosophila* symbiosis, we employed CRISPR-Cas9 to re-insert the deleted CCT triplet  
89 in the FlyG2.1.8 *ackA* locus (Methods; Fig. S6), so that we genetically revert the *ackA* allele in the  
90 FlyG2.1.8 isolate back to its ancestral form (17). The reverted strain (FlyG2.1.8<sup>Rev</sup>) bearing the  
91 ancestral *ackA* allele lost its increased capacity to promote animal growth when compared to the

92 ancestor strain (Fig. 1D,E). These results therefore demonstrate that the *ackA* mutation in  
93 *Lp*<sup>NIZO2877</sup> is a causative change resulting in faster and increased *Drosophila* growth.

94 To investigate the complete *L. plantarum* population dynamics during *Drosophila*  
95 symbiosis evolution, we sequenced the metagenome of whole bacterial population samples across  
96 the 20 *Drosophila* generations of the first replicate experiment. We identified both segregating and  
97 fixed mutations and tracked their frequencies through time (Methods). We found that the *ackA*  
98 mutation was the first variant to appear in the population. Remarkably, the *ackA* variant showed a  
99 rapid selective sweep and became fixed as early as after three *Drosophila* generations (Fig. 2A).  
100 This observation suggests a competitive advantage of the evolved *Lp*<sup>NIZO2877</sup> strains bearing this  
101 variant. To test this hypothesis, we performed a competition assay between the ancestral *Lp*<sup>NIZO2877</sup>  
102 strain and the derived FlyG2.1.8 isolate in symbiosis with *Drosophila* (Methods, Fig.2B, Fig. S7).  
103 We find that the evolved strain bearing only the *ackA* mutation starts outcompeting the ancestor  
104 strain as early as after one day, demonstrating that the *ackA* mutation confers a strong competitive  
105 advantage in symbiosis with *Drosophila*. To test whether such advantage requires the host's  
106 presence, we performed the same competition assay by inoculating only the bacterial strains on  
107 the *Drosophila* nutritional environment (i.e. the diet). Surprisingly, we observed that FlyG2.1.8  
108 outcompeted the ancestral strain even when the *Drosophila* host is absent (Fig. 2C). Therefore, the  
109 competitive advantage of *L. plantarum* isolates bearing the *ackA* variant is likely independent of  
110 the animal host.

111 Intrigued by this result, we questioned whether the animal host has an influence on the  
112 evolution of its symbiotic bacteria. To test this, we experimentally evolved *Lp*<sup>NIZO2877</sup> in the same  
113 low-yeast fly diet, but without *Drosophila* (Methods; Fig. S8) and tested their capacity to promote  
114 fly growth throughout the course of the experimental evolution. Strikingly, in two parallel

115 experiments, the  $Lp^{NIZO2877}$  strains evolved in the absence of the host also increased their ability to  
116 promote *Drosophila* growth (Fig. 3A,B). Furthermore, genome sequencing of single evolved  
117 isolates from both experiments again revealed the acquisition of novel mutations in the *ackA* gene  
118 (Fig. 3C; Fig. S9). Taken together, these findings show that the genomic evolution of *L. plantarum*  
119 is driven by the adaptation to host nutritional environment, rather than to its host *per se*; the  
120 acquisition of the *ackA* variant is sufficient to drive the adaptive process to the nutrition, which  
121 ultimately results in the improvement of *L. plantarum* symbiotic effect on *Drosophila*.

122 We next investigated how *L. plantarum* adaptation to the nutritional environment enhances  
123 *Drosophila* growth. We postulated that *L. plantarum* adaptation to the specific nutritional  
124 environment of *Drosophila* would lead to the production of metabolites that are beneficial for  
125 *Drosophila* growth. To test this hypothesis, we analyzed the metabolome of *Drosophila* diets  
126 colonized with either  $Lp^{NIZO2877}$  or the evolved FlyG2.1.8 strain that bears only the *ackA* variant.  
127 Among all of the metabolites differentially detected in the substrate (Table S6), we observed a  
128 significant and robust increase in the levels of N-acetyl-amino-acids in the diet processed by the  
129 evolved strain (Fig. 4A). Specifically, N-acetyl-glutamine is one of the most differentially  
130 represented compounds between the two conditions. We therefore tested whether N-acetyl-  
131 glutamine is sufficient to improve the animal growth promoting capacity of  $Lp^{NIZO2877}$ .  
132 Remarkably, we find that, when N-acetyl-glutamine is added in a dose-dependent manner in the  
133 diet, the ancestor strain  $Lp^{NIZO2877}$  is able to recapitulate the beneficial effect conferred by  
134 FlyG2.1.8 on *Drosophila* growth (Fig. 4B). We then asked whether N-acetyl-glutamine enhances  
135 fly growth by improving  $Lp^{NIZO2877}$  fitness. To test this, we performed a competition assay between  
136  $Lp^{NIZO2877}$  and FlyG2.1.8 strains in the host diet supplemented with 0.1g/L of N-acetyl-glutamine.  
137 We find that FlyG2.1.8 outcompetes the ancestor strain even in presence of N-acetyl-glutamine

138 (Fig. S10). This result indicates that N-acetyl-glutamine does not confer a competitive advantage  
139 to *Lp*<sup>NIZO2877</sup> over FlyG2.1.8 while growing on the diet; nevertheless it benefits the host  
140 physiology. Taken together, these findings establish N-acetyl-amino-acids, and in particular N-  
141 acetyl-glutamine, as molecules produced by the evolved *L. plantarum* strains during growth on the  
142 *Drosophila* diet, which enhance *Drosophila* growth but not *Lp*<sup>NIZO2877</sup> fitness.

143 Our results uncover the nature of an adaptive process of *L. plantarum* while in symbiosis  
144 with its fly host. To our knowledge, this is the first direct experimental evidence showing that the  
145 host nutritional environment, and not the host *per se*, drives microbial adaptation and metabolic  
146 changes that alter the functional outputs of a facultative nutritional symbiosis. In our experimental  
147 context, the dietary substrate asserts the predominant selective pressure dictating the evolutionary  
148 change of facultative symbiotic bacteria and their consequent benefits to host physiology. Rapid  
149 adaptation of *L. plantarum* to the host nutritional environment occurred in multiple independent  
150 experimental lineages through the parallel fixations of different variants of a single gene, the  
151 acetate kinase *ackA*. This is a spectacular case of parallel evolution, indicating that the *ackA*  
152 mutation is the preferred or possibly the unique means for *L. plantarum*<sup>NIZO2877</sup> to adapt to its host  
153 nutritional environment. These harsh nutritional conditions of our experimental setting affect *L.*  
154 *plantarum* physiology by delaying its growth (Fig. S2). It was shown that the expression of *L.*  
155 *plantarum* *ackA* (*ack2* in the *L. plantarum* reference strain WCFS1) is down-regulated at low  
156 growth rates suggesting that silencing *ackA* would be required to cope with poor growth condition  
157 (18). This observation may explain the observed strong selection pressure on *ackA* in our  
158 experimental settings, which led to the rapid *de novo* emergence of different variants in the  
159 population (Fig. 2A). As a consequence, the strong competitive advantage given by these  
160 mutations led to their fixation (Fig. 2). Indeed, the *ackA* mutations found in the independent

161 lineages of adaptive evolution improve the fitness of *L. plantarum* cells on the fly diet (Fig. S11),  
162 and leads to the accumulation of bacterial products, such as N-acetyl-glutamine, that enhance host  
163 growth. However, N-acetyl-glutamine does not per se improve bacterial fitness so it remains  
164 elusive how *ackA* variants confers competitive advantage to *L. plantarum* cells on the fly diet. Our  
165 results indicate that these mutations possibly cause a shift in the metabolism of *L. plantarum* by  
166 modifying the usage of cellular acetyl groups, which would confer benefits to *Drosophila* larvae  
167 growth. *ackA* participates in the reversible conversion of acetate to acetyl-phosphate; *ackA* variants  
168 might impede this reaction, and therefore shunt the pools of cellular acetyl groups into different  
169 metabolic routes leading to the accumulation of other acetylated compounds, such as N-acetyl-  
170 amino-acids, which, once secreted, are consumed and beneficial to the host. Our results identify  
171 *ackA* as the first target of selection exerted by the nutritional environment on *Lp*<sup>NIZO2877</sup>. Due to  
172 the high genetic variability of *L. plantarum* species (19), we posit that such target hinges upon the  
173 genomic background of *Lp*<sup>NIZO2877</sup>. According to their network of genetic polymorphisms, other  
174 non-beneficial isolates might mutate different genes in order to adapt to the host environment and  
175 improve their symbiotic benefit. Regardless of the specificity of selection target, our findings  
176 determine that the host nutritional environment is the first driving force of such evolution.

177         Understanding how evolutionary forces shape host-microbe symbiosis is essential to  
178 comprehend the mechanisms of their functional influence. Using the facultative nutritional  
179 mutualism between *Drosophila* and *Lactobacillus plantarum* as a model, our results reveal that  
180 the primary selection pressure acting on *Lactobacillus plantarum* originates from the nutritional  
181 substrate alone, which is strong enough to drive the rapid fixation of a *de novo* mutation. The  
182 resulting genetic change confers a fitness advantage to the evolved bacteria and triggers a  
183 metabolic adaptation in bacterial cells, which is quickly capitalized by *Drosophila* as a



184 physiological growth advantage, and symbiosis can henceforth be perpetuated. Our results do not  
185 rule out the possibility that the animal host might exert additional selection pressure on its bacterial  
186 partners. Indeed, *Drosophila* is also known to directly impact the fitness of its own microbiota  
187 through the activity of innate immune effectors (20, 21) or the secretion of bacterial maintenance  
188 factors (22). Nevertheless, our findings demonstrate the utmost importance of the shared  
189 nutritional substrate in the evolution of *Drosophila-L. plantarum* symbiosis.

190 Symbiosis is an evolutionary imperative and facultative symbioses are widespread in  
191 nature. Despite their unequivocal diversity, animal-microbe symbioses share striking similarities  
192 (4) and nutrition often plays a major role in shaping the composition of symbiotic microbial  
193 communities (23–28). Our results provide the first direct experimental evidence that nutrition  
194 drives the evolution of a bacterial symbiont and, given that other animal and microbe partners have  
195 likely faced nutritional challenges over time, common evolutionary trajectories might have  
196 occurred. We therefore posit that bacterial adaptation to the diet can be the first step in the  
197 emergence and perpetuation of facultative animal-microbe symbioses. Our work provides another  
198 angle to unravel the complex adaptive processes in the context of evolving symbiosis.

199

## 200 **References**

- 201 1. M. McFall-Ngai *et al.*, Animals in a bacterial world, a new imperative for the life  
202 sciences. *Proc. Natl. Acad. Sci.* **110**, 3229–3236 (2013).
- 203 2. F. Leulier *et al.*, Integrative Physiology: At the Crossroads of Nutrition, Microbiota,  
204 Animal Physiology, and Human Health. *Cell Metab.* **25** (2017), pp. 522–534.
- 205 3. R. M. Fisher, L. M. Henry, C. K. Cornwallis, E. T. Kiers, S. A. West, The evolution of  
206 host-symbiont dependence. *Nat. Commun.* **8** (2017), doi:10.1038/ncomms15973.

- 207 4. K. R. Foster, J. Schluter, K. Z. Coyte, S. Rakoff-Nahoum, The evolution of the host  
208 microbiome as an ecosystem on a leash. *Nature*. **548** (2017), pp. 43–51.
- 209 5. A. E. Douglas, J. H. Werren, Holes in the hologenome: Why host-microbe symbioses are  
210 not holobionts. *MBio*. **7** (2016), , doi:10.1128/mBio.02099-15.
- 211 6. R. C. Matos, F. Leulier, Lactobacilli-Host mutualism: “learning on the fly.” *Microb. Cell*  
212 *Fact*. **13**, S6 (2014).
- 213 7. B. Erkosar, G. Storelli, A. Defaye, F. Leulier, Host-intestinal microbiota mutualism:  
214 “learning on the fly.” *Cell Host Microbe*. **13** (2013), pp. 8–14.
- 215 8. J. Ferrari, F. Vavre, Bacterial symbionts in insects or the story of communities affecting  
216 communities. *Philos. Trans. R. Soc. B Biol. Sci*. **366**, 1389–1400 (2011).
- 217 9. A. E. Douglas, Lessons from studying insect symbioses. *Cell Host Microbe*. **10**, 359–367  
218 (2011).
- 219 10. P. Engel, N. A. Moran, The gut microbiota of insects - diversity in structure and function.  
220 *FEMS Microbiol. Rev*. **37** (2013), pp. 699–735.
- 221 11. G. Storelli *et al.*, Lactobacillus plantarum promotes Drosophila systemic growth by  
222 modulating hormonal signals through TOR-dependent nutrient sensing. *Cell Metab*. **14**,  
223 403–14 (2011).
- 224 12. B. Erkosar *et al.*, Pathogen Virulence Impedes Mutualist-Mediated Enhancement of Host  
225 Juvenile Growth via Inhibition of Protein Digestion. *Cell Host Microbe*. **18**, 445–455  
226 (2015).
- 227 13. D. Ma, G. Storelli, M. L. Mitchell, F. Leulier, Studying Host-Microbiota Mutualism in  
228 Drosophila: Harnessing the Power of Gnotobiotic Flies. *Biomed. J.*, 285–293 (2015).
- 229 14. R. C. Matos *et al.*, D-Alanylation of teichoic acids contributes to Lactobacillus plantarum-

- 230 mediated *Drosophila* growth during chronic undernutrition. *Nat. Microbiol.* **2**, 1635–1647  
231 (2017).
- 232 15. M. Schwarzer *et al.*, *Lactobacillus plantarum* strain maintains growth of infant mice  
233 during chronic undernutrition. *Science*. **351**, 854–857 (2016).
- 234 16. M. E. Martino *et al.*, Nearly complete genome sequence of *Lactobacillus plantarum* strain  
235 NIZO2877. *Genome Announc.* (2015), doi:10.1128/genomeA.01370-15.
- 236 17. W. Jiang, D. Bikard, D. Cox, F. Zhang, L. A. Marraffini, RNA-guided editing of bacterial  
237 genomes using CRISPR-Cas systems. *Nat. Biotechnol.* **31**, 233–239 (2013).
- 238 18. P. Goffin *et al.*, Understanding the physiology of *Lactobacillus plantarum* at zero growth.  
239 *Mol. Syst. Biol.* **6** (2010), doi:10.1038/msb.2010.67.
- 240 19. M. E. Martino *et al.*, Nomadic lifestyle of *Lactobacillus plantarum* revealed by  
241 comparative genomics of 54 strains isolated from different habitats. *Environ. Microbiol.*  
242 **18** (2016), doi:10.1111/1462-2920.13455.
- 243 20. J. H. Ryu *et al.*, Innate immune homeostasis by the homeobox gene *Caudal* and  
244 commensal-gut mutualism in *Drosophila*. *Science (80-. )*. **319**, 777–782 (2008).
- 245 21. L. Guo, J. Karpac, S. L. Tran, H. Jasper, PGRP-SC2 Promotes Gut Immune Homeostasis  
246 to Limit Commensal Dysbiosis and Extend Lifespan. *Cell*. **156**, 109–22 (2014).
- 247 22. Storelli *et al.*, *Drosophila* Perpetuates Nutritional Mutualism by Promoting the Fitness of  
248 Its Intestinal Symbiont *Lactobacillus plantarum*. *Cell Metab.* (2018),  
249 doi:10.1016/j.cmet.2017.11.011
- 250 23. M. Groussin *et al.*, Unraveling the processes shaping mammalian gut microbiomes over  
251 evolutionary time. *Nat. Commun.* **8** (2017), doi:10.1038/ncomms14319.
- 252 24. M. A. Conlon, A. R. Bird, The impact of diet and lifestyle on gut microbiota and human

- 253 health. *Nutrients*. **7**, 17–44 (2015).
- 254 25. C. A. Lozupone, J. I. Stombaugh, J. I. Gordon, J. K. Jansson, R. Knight, Diversity,  
255 stability and resilience of the human gut microbiota. *Nature*. **489**, 220–230 (2012).
- 256 26. L. A. David *et al.*, Host lifestyle affects human microbiota on daily timescales. *Genome*  
257 *Biol.* **15** (2015), doi:10.1186/gb-2014-15-7-r89.
- 258 27. B. D. Muegge *et al.*, Diet drives convergence in gut microbiome functions across  
259 mammalian phylogeny and within humans. *Science (80-. )*. **332**, 970–974 (2011).
- 260 28. S. Hacquard *et al.*, Microbiota and host nutrition across plant and animal kingdoms. *Cell*  
261 *Host Microbe*. **17**, 603–616 (2015).
- 262 29. L. K. Poulsen, T. R. Licht, C. Rang, K. A. Krogfelt, S. Molin, Physiological state of  
263 *Escherichia coli* BJ4 growing in the large intestines of streptomycin-treated mice. *J.*  
264 *Bacteriol.* **177**, 5840–5845 (1995).
- 265 30. C. D. Packey *et al.*, Molecular detection of bacterial contamination in gnotobiotic rodent  
266 units. *Gut Microbes*. **4**, 361–370 (2013).
- 267 31. F. Widdel, Theory and measurement of bacterial growth. *Di dalam Grundpraktikum*  
268 *Mikrobiol.*, 1–11 (2007).
- 269 32. C. a Schneider, W. S. Rasband, K. W. Eliceiri, NIH Image to ImageJ: 25 years of image  
270 analysis. *Nat. Methods*. **9**, 671–675 (2012).
- 271 33. D. E. Deatherage, J. E. Barrick, Identification of mutations in laboratory-evolved  
272 microbes from next-generation sequencing data using breseq. *Methods Mol. Biol.* **1151**,  
273 165–188 (2014).
- 274 34. Y. Choi, G. E. Sims, S. Murphy, J. R. Miller, A. P. Chan, Predicting the Functional Effect  
275 of Amino Acid Substitutions and Indels. *PLoS One*. **7** (2012),

- 276 doi:10.1371/journal.pone.0046688.
- 277 35. D. G. Gibson *et al.*, Enzymatic assembly of DNA molecules up to several hundred  
278 kilobases. *Nat. Methods*. **6**, 343–345 (2009).
- 279 36. T. Duong, M. J. Miller, R. Barrangou, M. A. Azcarate-Peril, T. R. Klaenhammer,  
280 Construction of vectors for inducible and constitutive gene expression in *Lactobacillus*.  
281 *Microb. Biotechnol.* **4**, 357–367 (2011).
- 282 37. M. Teresa Alegre, M. Carmen Rodríguez, J. M. Mesas, Transformation of *Lactobacillus*  
283 *plantarum* by electroporation with in vitro modified plasmid DNA. *FEMS Microbiol. Lett.*  
284 **241**, 73–77 (2004).
- 285 38. K. Thompson<sup>a</sup>, M. A. Collins<sup>b</sup>, Methods Improvement in electroporation efficiency for  
286 *Lactobacillus plantarum* by the inclusion of high concentrations of glycine in the growth  
287 medium. *J. of Microbiological J. Microbiol. Methods*. **26**, 73–79 (1996).
- 288 39. K. Spath, S. Hein, R. Grabherr, “Direct cloning in *Lactobacillus plantarum*:  
289 Electroporation with non-methylated plasmid DNA enhances transformation efficiency  
290 and makes shuttle vectors obsolete.” *Microb. Cell Fact.* **11**, 141 (2012).
- 291 40. A. a Gomaa *et al.*, Programmable Removal of Bacterial Strains by Use of Genome-  
292 Targeting CRISPR/Cas Systems. *MBio*. **5**, e00928-13 (2014).
- 293 41. M. Kearse *et al.*, Geneious Basic: An integrated and extendable desktop software platform  
294 for the organization and analysis of sequence data. *Bioinformatics*. **28**, 1647–1649 (2012).
- 295 42. M. E. Martino *et al.*, Resequencing of the *Lactobacillus plantarum* strain WJL genome.  
296 *Genome Announc.* (2015), doi:10.1128/genomeA.01382-15.
- 297 43. M. Kleerebezem *et al.*, Complete genome sequence of *Lactobacillus plantarum* WCFS1.  
298 *Proc. Natl. Acad. Sci. U. S. A.* **100**, 1990–5 (2003).

299 44. J. P. Van Pijkeren, R. A. Britton, High efficiency recombineering in lactic acid bacteria.  
300 *Nucleic Acids Res.* **40** (2012), doi:10.1093/nar/gks147.

301

302 **Acknowledgements:** We thank B. Prud'homme and colleagues at the Institut de Génomique  
303 Fonctionnelle de Lyon for critical reading of the manuscript. WCFS1 was a kind gift from Dr.  
304 Nikhil U. Nair. Plasmids pJP042 and pJP005 were both provided by the van-Pijkeren lab.  
305 pMSP3545 (CN#46888) and pCas9 (CN# 42876) were both obtained from Addgene. EC135 was  
306 provided to us by Tingyi Wen. We gratefully acknowledge support from the PSMN (Pôle  
307 Scientifique de Modélisation Numérique) of the ENS de Lyon for the computing resources. We  
308 thank University of Padua and Dr. Barbara Cardazzo for hosting M.E.M. during the last stages of  
309 this research. **Funding:** This work was funded by an ERC starting grant (FP7/2007-2013-  
310 N°309704). M.E.M. was funded by the European Union's Horizon 2020 research and innovation  
311 programme under the Marie Skłodowska-Curie grant agreement N°659510. The lab of F.L. is  
312 supported by the FINOVI foundation and the EMBO Young Investigator Program. The  
313 CRISPR/Cas9 work was supported through funding from the National Science Foundation (MCB-  
314 1452902 to C.L.B.). **Author Contributions:** M.E.M. and F.L. designed the project; M.E.M. and  
315 H.G. conducted the experiments; M.E.M. and P.J. conducted the bioinformatics analyses; R.L.,  
316 M.S. and C.L.B. designed and performed the CRISPR-Cas9 engineering experiments; S.H. and  
317 B.G. generated the sequencing data; M.E.M. and F.L. analyzed the data and wrote the paper.  
318 **Competing interests:** The authors declare no competing financial interests. **Data and materials**  
319 **availability:** All data is available in the main text or the supplementary materials.

320

321

322

## Figures

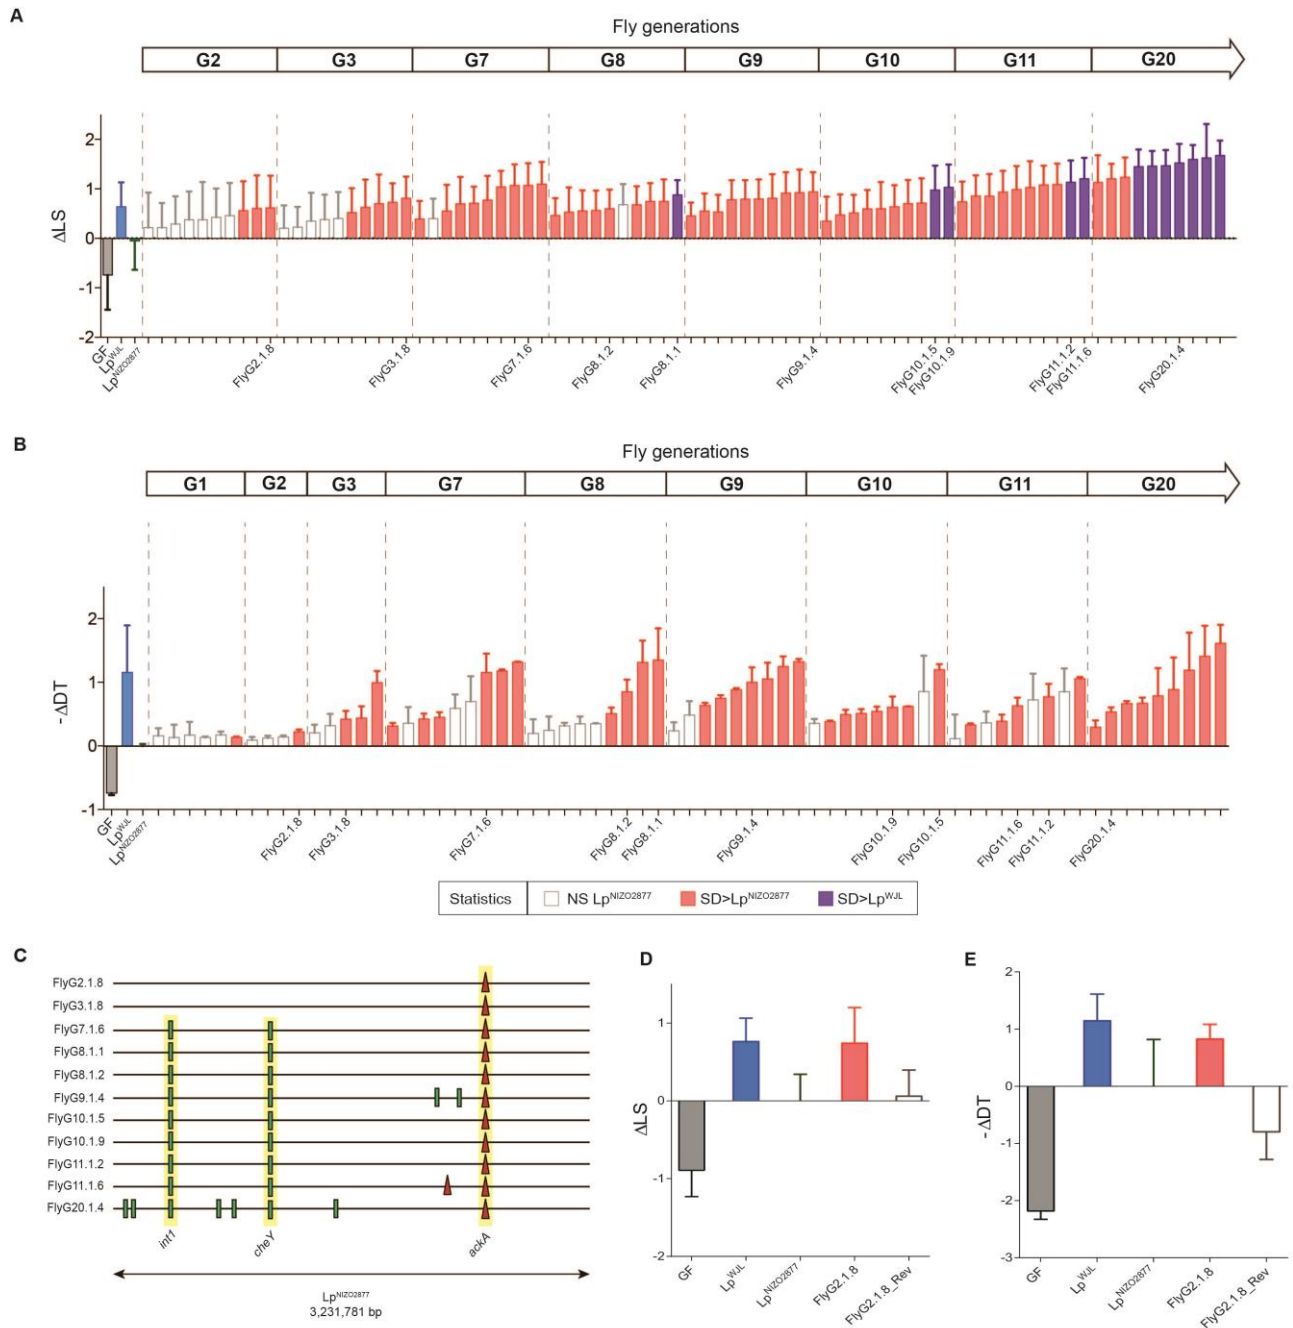

323

324 **Fig. 1. Experimental evolution of *L. plantarum* with *Drosophila melanogaster* improves its**

325 **growth promoting effect. A, Longitudinal size of larvae (LS) measured 7 days after egg**

326 **deposition (AED) on poor nutrient diet. Larvae were kept germ-free (GF) or associated with**

327  $Lp^{NIZO2877}$  (ancestor),  $Lp^{WJL}$  (growth-promoting *L. plantarum* strain) or  $Lp^{NIZO2877}$ -evolved strains.  
328 The delta ( $\Delta LS$ ) between the size of larvae associated with the respective condition and the size of  
329 larvae associated with  $Lp^{NIZO2877}$  is shown from *Drosophila* generation 2 (G2) to generation 20  
330 (G20).  $Lp^{NIZO2877}$ -evolved strains that exhibited a significant difference at promoting larval growth  
331 compared to their ancestor (Student's t test:  $p < 0.05$ ) are shown in red.  $Lp^{NIZO2877}$ -evolved strains  
332 that exhibited a significant difference at promoting larval growth compared to the beneficial *L.*  
333 *plantarum*  $Lp^{WJL}$  strain are shown in purple. **B**, Developmental timing (DT) of individuals that  
334 were kept GF or associated with  $Lp^{NIZO2877}$ ,  $Lp^{WJL}$  or  $Lp^{NIZO2877}$ -evolved strains isolated from  
335 *Drosophila* G1 to G20. The minus delta ( $-\Delta DT$ ) between the mean time of emergence of 50% of  
336 the pupae associated with the respective condition and the mean time of emergence of 50% of the  
337 pupae associated with  $Lp^{NIZO2877}$  is shown in the graph.  $Lp^{NIZO2877}$ -evolved strains that exhibited a  
338 significant difference at accelerating developmental timing compared to the ancestor (Student's t  
339 test:  $p < 0.05$ ) are shown in red. The evolved strains that have been selected for further analyses are  
340 labelled on the x axis. **C**, Mutations identified in  $Lp^{NIZO2877}$ -evolved strains from *Drosophila*  
341 generation 2 (G2) to generation 20 (G20) represented along  $Lp^{NIZO2877}$  genome. The genome of  
342 each evolved strain is represented as a horizontal line. Red triangles indicate deletions and small  
343 green bars show single nucleotide polymorphisms. Mutations occurring in the same gene of  
344 different strains and fixed along the experimental evolution are highlighted in yellow (*int1*, *cheY*,  
345 *ackA*). **D**, Longitudinal size of larvae measured 7 days AED on poor nutrient diet. Larvae were  
346 kept germ-free (GF) or associated with  $Lp^{NIZO2877}$ ,  $Lp^{WJL}$ , FlyG2.1.8 or with FlyG2.1.8-reverted  
347 strain (FlyG2.1.8<sup>Rev</sup>). The delta ( $\Delta LS$ ) between the size of larvae associated with the respective *L.*  
348 *plantarum* strain and the size of larvae associated with  $Lp^{NIZO2877}$  is shown. **E**, Developmental  
349 timing (DT) of individuals that were kept GF or associated with  $Lp^{NIZO2877}$ ,  $Lp^{WJL}$ , FlyG2.1.8 or



350 with FlyG2.1.8<sup>Rev</sup> strain. The minus delta ( $-\Delta DT$ ) between the mean time of emergence of 50% of  
351 the pupae associated with the respective condition and the mean time of emergence of 50% of the  
352 pupae associated with *Lp*<sup>NIZO2877</sup> is shown in the graph.

353

354

355

356

357

358

359

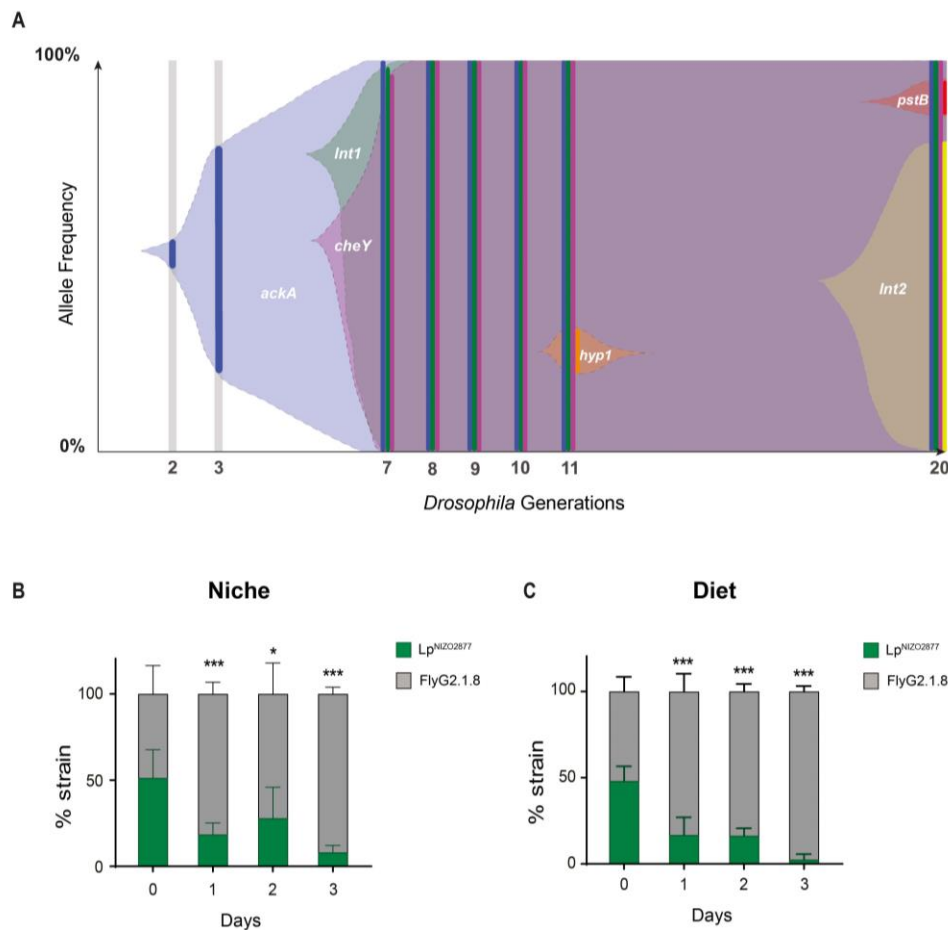

360

361 **Fig. 2. *Lp*<sup>NIZO2877</sup>-evolved strain shows higher fitness compared to the ancestor.** **A**, Muller  
362 diagram showing the genome evolutionary dynamics of *Lp*<sup>NIZO2877</sup> population (I replicate) along  
363 20 *Drosophila* generations. The y-axis shows the percentage of the detected frequencies of each  
364 mutation (plain colours). Shaded areas represent the inferred mutation frequencies. Lower axis  
365 shows the fly generation where the sampling took place. **B-C**, 1:1 competitive assay between  
366 *Lp*<sup>NIZO2877</sup> and *Lp*<sup>NIZO2877</sup>-evolved strain (FlyG2.1.8) in poor nutrient diet with *Drosophila* larvae  
367 (**B**) and without *Drosophila* larvae (**C**). Bars represent the percentage of each strain detected in  
368 each sample (Niche or Diet) by qPCR. \* $P < 0.05$ , \*\*\* $P < 0.01$ , obtained by Student's t-test.

369

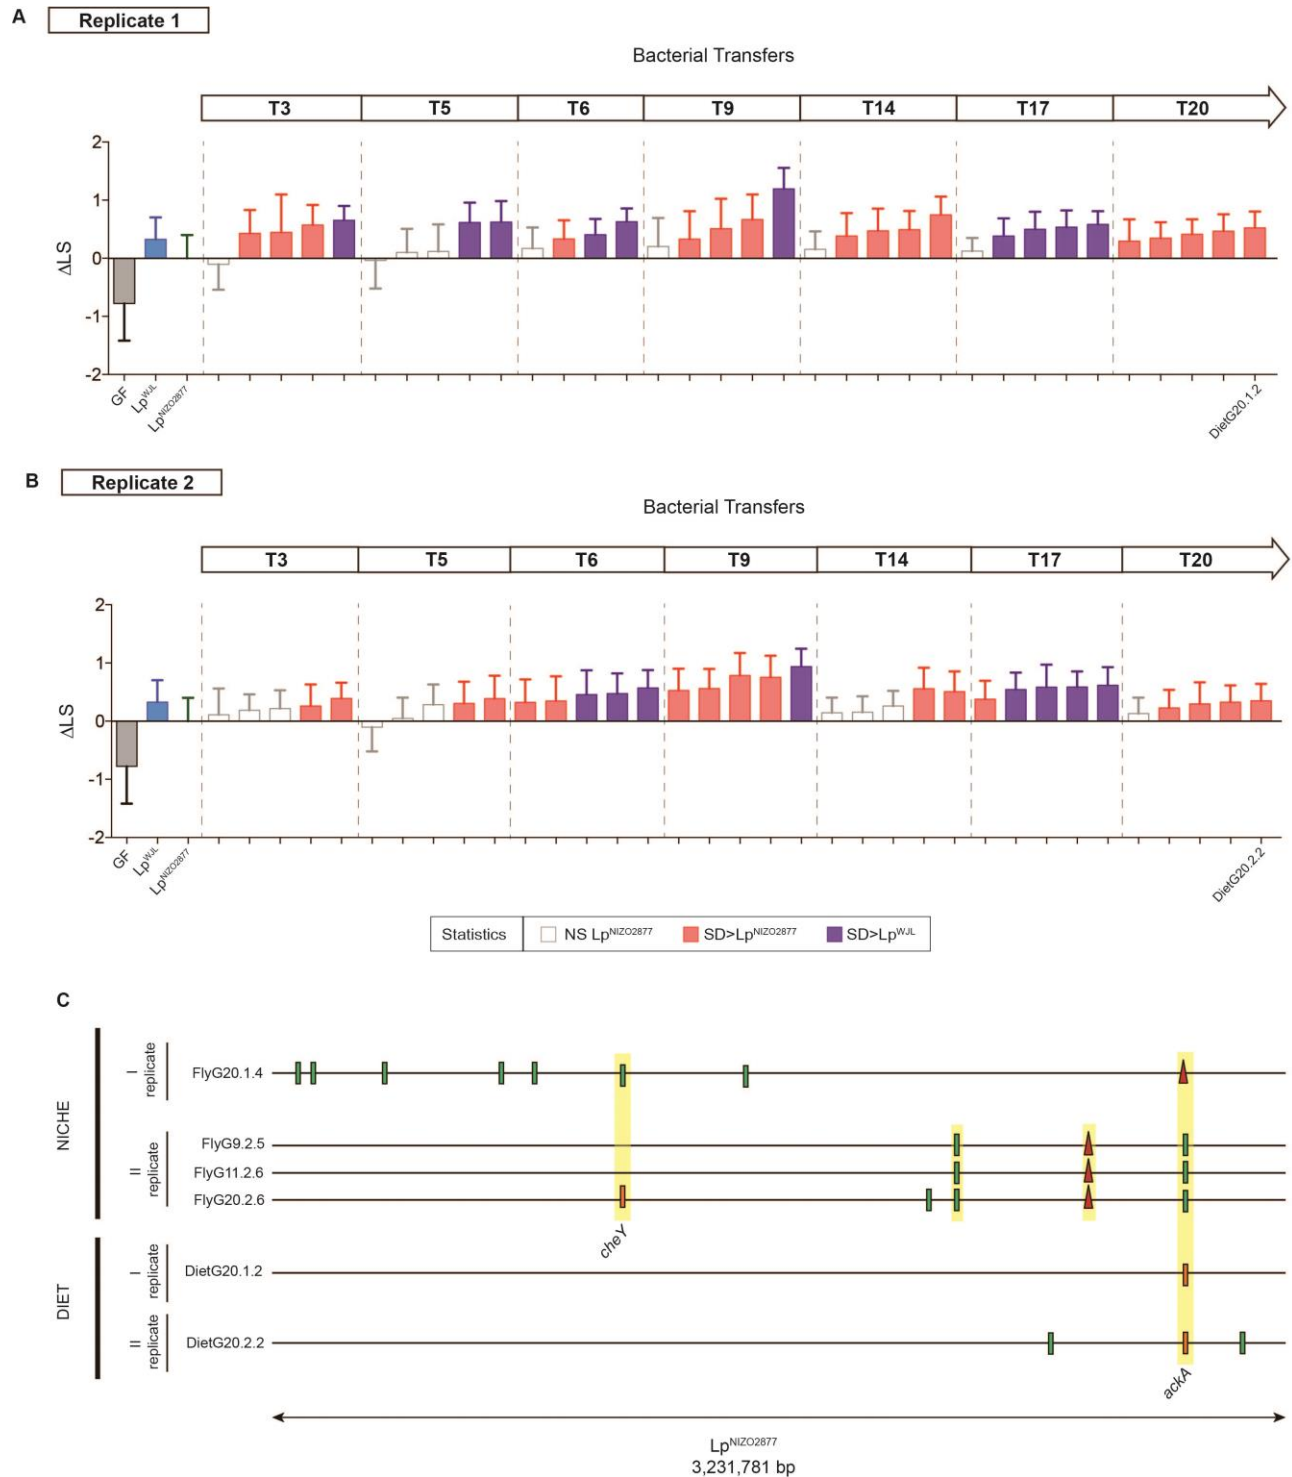

370

371 **Fig. 3.  $Lp^{NIZO2877}$  adaptation to the diet increases its host's growth.** A,B, Longitudinal size of

372 larvae (LS) measured 7 days after egg deposition (AED) on poor nutrient diet. Larvae were kept

373 germ-free (GF) or associated with  $Lp^{NIZO2877}$ ,  $Lp^{WJL}$  and with  $Lp^{NIZO2877}$ -evolved strains evolved

374 in poor nutrient diet in the absence of *Drosophila*. The delta ( $\Delta$ LS) between the size of larvae  
375 associated with  $Lp^{NIZO2877}$ -evolved strains and the size of larvae associated with  $Lp^{NIZO2877}$  is  
376 shown from transfer 3 (T3) to transfer 20 (T20) for the first replicate (**A**) and the second replicate  
377 (**B**) of evolution.  $Lp^{NIZO2877}$ -evolved strains that exhibited a significant difference at promoting  
378 larval growth compared to their ancestor (Student's t test:  $p < 0.05$ ) are shown in red.  $Lp^{NIZO2877}$ -  
379 evolved strains that exhibited a significant difference at promoting larval growth compared to the  
380 beneficial *L. plantarum*  $Lp^{WJL}$  strain are shown in purple. The evolved strains that have been  
381 selected for further analyses are labelled on the x axis. **c**, Mutations identified in  $Lp^{NIZO2877}$ -derived  
382 strains of all replicates evolved in poor nutrient diet with *Drosophila* larvae (Niche) and in poor  
383 nutrient diet without *Drosophila* larvae (Diet). Each evolved strain genome is represented as a  
384 horizontal line. Red triangles indicate deletions and small bars shows single nucleotide  
385 polymorphisms. Different colours indicate different variants. Mutations occurring in the same gene  
386 and fixed along the experimental evolution are highlighted in yellow. The genes mutated in  
387 independent replicates of experimental evolution are labelled (*cheY*, *ackA*).

388

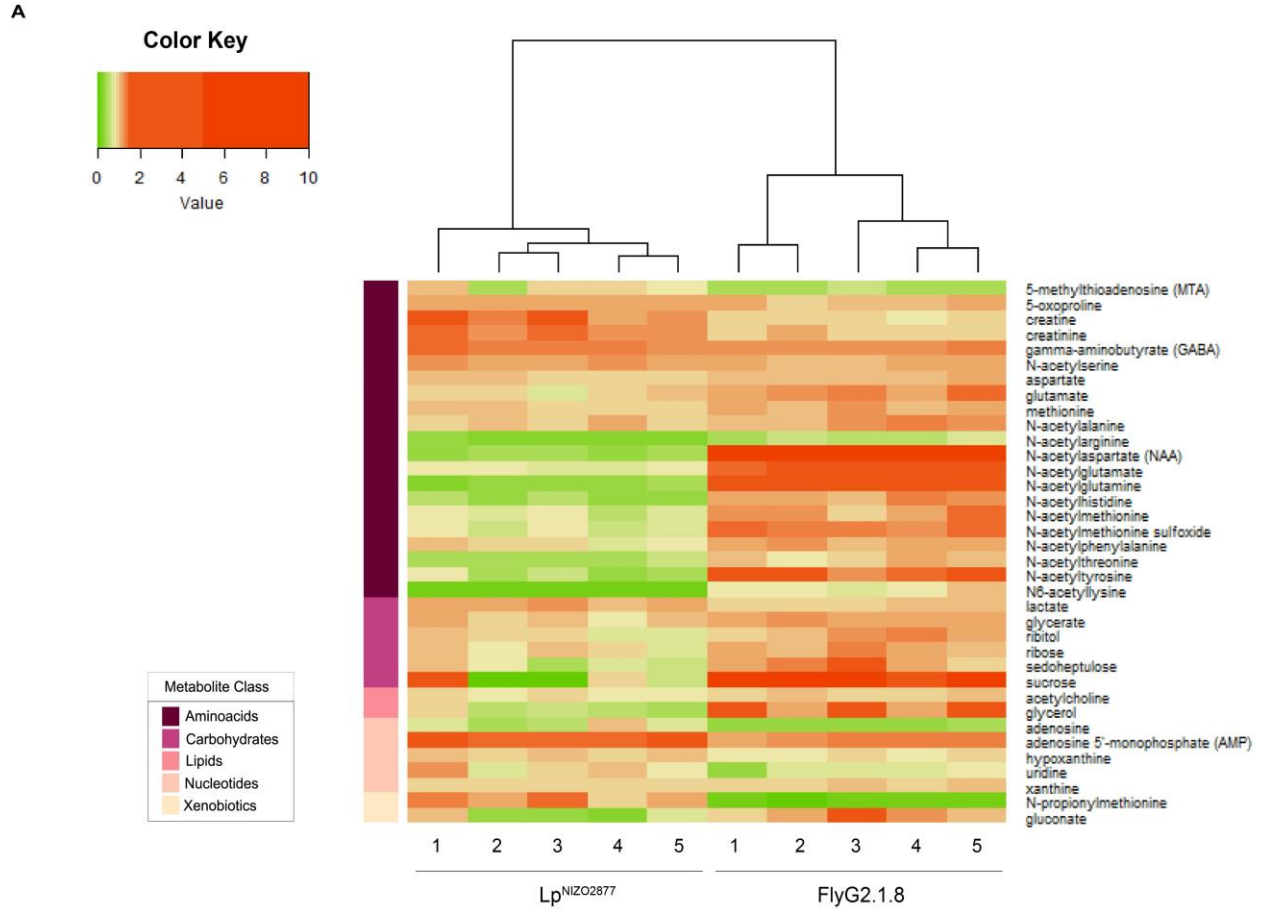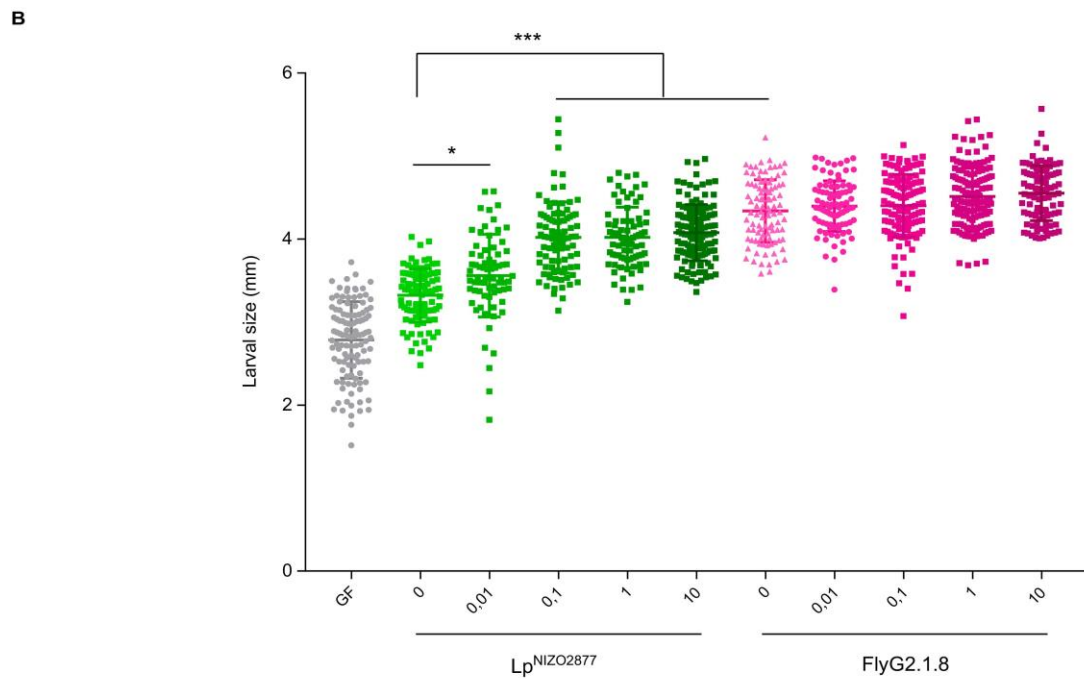

389

390 **Fig. 4. N-acetyl-glutamine recapitulates the beneficial effect of FlyG2.1.8 on *Lp*<sup>NIZO2877</sup>-**  
391 **associated larvae. A,** Heat map showing the metabolites that differ significantly between  
392 experimental groups (*Lp*<sup>NIZO2877</sup> and FlyG2.1.8) (two-sided *t*-tests  $p < 0.05$ ). The heat map was  
393 generated with *heatmap.2* function in R. The compounds are ordered by the metabolite class  
394 given by the left scale. **B,** Longitudinal size of larvae ( $n > 60$  larvae/group) measured 7 days after  
395 egg deposition on poor nutrient diet supplemented with different concentrations (g/L) of N-  
396 acetyl-glutamine (x axis). Larvae were kept germ-free (no supplementation of N-acetyl-  
397 glutamine) or associated with *Lp*<sup>NIZO2877</sup> (ancestor) and with Fly.G2.1.8 (evolved strain). Larval  
398 size is shown as mean  $\pm$  s.e.m. \*  $P < 0.05$ , \*\*\*  $P < 0.01$ .  
399
